# Supplementary material
Source: Royal Society of Chemistry journal article supplement (doi:10.1039/d6nj00802j)
Supplement: d6nj00802j1.pdf [file d6nj00802j1.pdf]

**Table S1.** Comparison Kinetic models of pseudo-first-order and pseudo-second-order for adsorption of Cr(VI)

| Statistical parameters | pseudo-first-order | pseudo-second-order |
|------------------------|--------------------|---------------------|
| $R^2$                  | 0.9912             | 0.9966              |
| $R^2_{\text{Pred}}$    | 0.9575             | 0.9939              |
| ARE                    | 0.0373             | 0.0161              |

**Table S2.** Parameters of the intraparticle diffusion model for Cr(VI) adsorption

| Intra-particle diffusion( $R^2$ ) |           |
|-----------------------------------|-----------|
| 0.9942(1)                         | 0.9241(2) |

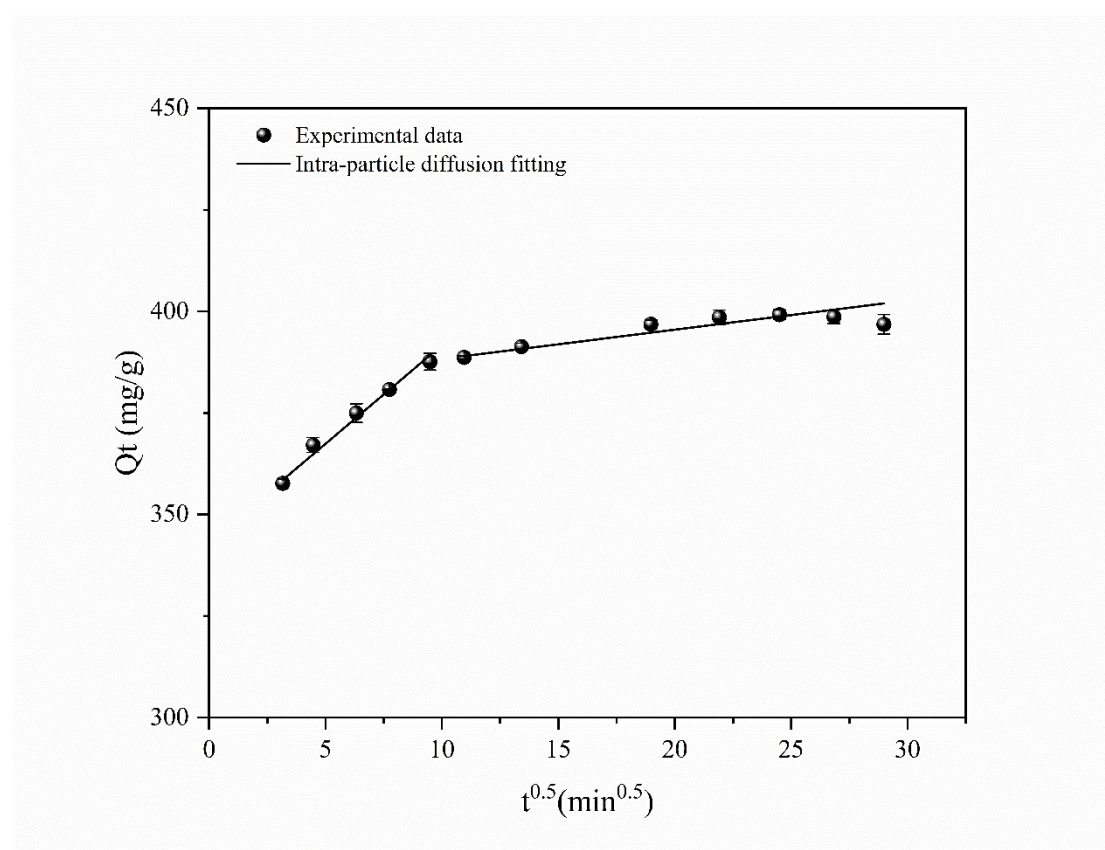

**Fig. S1** intraparticle diffusion model for Cr(VI) adsorption
